# Supplementary material for: Effects of Flupyradifurone and Two Reference Insecticides Commonly Used in Toxicological Studies on the Larval Proteome of the Honey bee Apis mellifera
Source: Insects. 2023 Jan 12;14(1):77. doi: 10.3390/insects14010077 (PMC9862931; doi:10.3390/insects14010077)
Supplement: Supplementary file 1 [file insects-14-00077-s001.zip]

Archive with 4 entries (4 files):
- S1-Supplementary data peptides.pdf
- S2-Supplementary data peptides.pdf
- S3-replica Gel images.pdf
- S4-Supplementary data.xlsx
