# Supplementary material for: Effects of Flupyradifurone and Two Reference Insecticides Commonly Used in Toxicological Studies on the Larval Proteome of the Honey bee Apis mellifera
Source: Insects. 2023 Jan 12;14(1):77. doi: 10.3390/insects14010077 (PMC9862931; doi:10.3390/insects14010077)
Supplement: Supplementary file 1 [file insects-14-00077-s001.zip › S1-Supplementary data peptides.pdf]

## **Supplementary Materials S1**

Effects of flupyradifurone and two reference insecticides, commonly used in toxicological studies, on the larval proteome of the honey bee *Apis mellifera*

Arne Kablau<sup>1,2</sup>, Silvio Erler<sup>3,4</sup>, Jakob H. Eckert<sup>3,5</sup>, Jens Pistorius<sup>3</sup>, Soroush Sharbati<sup>1</sup> and Ralf Einspanier<sup>1\*</sup>

<sup>1</sup> Institute of Veterinary Biochemistry, Freie Universität Berlin, Germany

<sup>2</sup> LABOKLIN GmbH and Co. KG, Bad Kissingen, Germany

<sup>3</sup> Institute for Bee Protection, Julius Kühn Institute (JKI) - Federal Research Centre for Cultivated Plants, Braunschweig, Germany

<sup>4</sup> Zoological Institute, Technische Universität Braunschweig, Germany

<sup>5</sup> Institute for Microbiology, Technische Universität Braunschweig, Germany

\* Correspondence: Ralf.Einspanier@fu-berlin.de; Tel.: +493083862575

### **S1-Supplementary peptide data**

Matched peptides of five proteins after 2D-gelelectrophoresis and identification via LC/MS.

1 - Matched peptides for **3-Ketoacyl-CoA thiolase** are shown in **bold red**.

1 MSLVTK**GIFI VAAKRTPFGS FGGK**FMNK**NA TDL**S**VIAAKS** ALQSAKLNPE  
51 KVDNVIFGHV LPISSDGGF LTRHVALK**SG IPLEKPSFSL** NRLCGSGFQS  
101 IVSGAQSILL GESKIVLTGG VENMSQVPFS VRNIRFGTSL GQKYQFEDSL  
151 WLGFSDTYCN LSMGETAEK**L GSQYNLKRQE VDEF**ALRSQQ LWKAANDAGR  
201 **FNEEIAPVTI TVKKQDIVVN TDEHPRPQTT LQNL**SKLPS**I FKKD**GLVTAG  
251 SSSGISDGAG VIILASEEVI **KTEQLTPLAR** LVGYSVVGVE PSIMGIGVPV  
301 AIQKLLKITN KTLNDIELIE INEAFGSQTL ACVKELKLDI NK**LNVDGGSI**  
351 **ALGHPLAASG SRITAH**L**VHE LRRR**KTGSLG IGSACIGGGQ GIALMIEAL

2 - Matched peptides for **major royal jelly protein 2** are shown in **bold red**.

1 MTRWLFMVAC LGIACQGAIV RENSPRNLEK SLNVIHEWKY FDYDFGSEER  
51 RQAAIQSGEY DHTKNYPFDV DQWRDK**TFVT ILRYDGV**PST LN**VISGK**TGK  
101 GGRLLPYPD WSFAEFKDCS KIVSAFK**IAI DKFDR**LWVLD SGLVNRTVPV  
151 CAPK**LHVFDL** KTSNHLKQIE IPHDI AVNAT TGKGGLVSLA VQAIDLANTL  
201 VYMADHK**GDA LIVYQN**ADDS **FHRLTSNTFD YDPRYAKMTI** DGESFTLKNG  
251 ICGMALSPVT NNLYYSPLAS HGLYYVNTAP FMK**SQFGENN VQYQ**GS**EDIL**  
301 **NTQSLAK**AVS KNGVLFVGLV GNSAVGCWNE HQSLQR**QNLE MVAQ**NDRT**LQ**  
351 **MIAGMKI**KEE LPHFVGSNKP VKDEYMLVLS NRMQKIVNDD FNFDDVNFRI  
401 LGANVKELIR NTHCVNNNQDN IQNNTNNQN DNNQKNNKKN ANNQKNNNQDN  
451 DN

3 - Matched peptides for **glutathione S-transferase S1-like** are shown in *bold red*.

1 MTERQPLYKL IYFNARGRAE HIRYIFAYAG IDYVDERILK ECWPELKKS  
51 PYGMLPVL EI NGKPIAQSN VARYLARKHN LTGRDEWEAM MCDVLVDTLG  
101 DLKQFISQYR IEEDLFKKKE KKMKLLKETI PFYLNKFEQI ISENGSYTVG  
151 TTTTWADFVF AVALENFENI FGTMALENYP GLRALKKRVH EIPSIVNWLS  
201 KRPHTEFGRV LLLFHFTNLI RNFYLYSKMS TYK**LTYFPVK GLGEP**IRFL  
251 **SYAGISFEDE RFD**RDDWPKI KPTT**PF**GQVP VLDVDGKKIA QSV**AI**SRYLA  
301 **KK**SLAGKDD WE**AL**EIDSIV DT**IH**DVRARL AAFHYEENE**E** IKA**AK**RKIAD  
351 **EV**PPYLERL **DA**QVK**NN**GGY FVG**GA**LSWAD LSFV**AL**LDYL NFMNGSD**L**IE  
401 KYD**N**LKQ**L**KE KVL**N**LPAIKS WLDKRPH**S**DF

4 - Matched peptides for **retinal dehydrogenase 1** are shown in *bold red*.

1 MKMNRKIDIK **YT**QLFINNNF VDSVSGKK**F**S TINPADGSVI AEISEGDKAD  
51 **V**DKAVAAAKE AFSRKS**K**WRT MDASVRGNLM NK**FAD**LIARD LEYIATLETL  
101 **D**NGK**T**YS**D**AL **FD**IEAS**I**QTI RYASWCDKI FGDTIPADGN LISL**T**RKEPV  
151 GVV**G**QIIPWN YPFLMLAW**K**W SPALATGCTI VLKPAEQT**P**L SALYAAALAK  
201 **EAG**FP**P**GVIN VITGYGPTAG AAIAEHPEIN KIAFTG**S**TEV GHLIMAASAK  
251 SNL**K**RVSLEL G**G**K**S**PLV**I**FD DVDI**K**EAAEI AFNAIFAN**H**G QNCCAGS**R**TF  
301 VHAK**I**YDQ**F**V NHAKQLASQR KVGDPFN**S**ET Q**Q**GPQIDEEM FHKVLS**L**IK**S**  
351 **G**QEEGAVLET GGERHGN**V**GY FIKPTVFS**N**V TDTM**R**IAKEE IFGPVQS**L**IK  
401 **F**ETMDEVIER ANNTNYGLAA G**V**VT**K**NIDKA LIFAQAVEAG SVWINCYDAI  
451 TPQTPFGG**F**K QSGIG**R**ELGA E**L**G**L**KEYLE**T**K TISIKVSNN

5 - Matched peptides for **14-3-3 protein zeta** shown in *bold red*.

1 MSVDKEELVQ RAK**LAEQAER YDDMAAAMKA VTETGV**ELSN EERNLLSVAY  
51 **K**NVVGARRSS WR**VISSIEQK TEGSERKQ**QM AKEYREKVEK ELREICYDVL  
101 **G**LLDKYL**I**PK ASNAESKV**F**Y LKMKG**D**YYRY **LA**EVATGETR NAVVDDS**Q**KA  
151 **YQDAFEISK**S KM**Q**PTHPIRL GLALNFSV**F**Y YEILNSPDKA CQLAK**QAFDD**  
201 **AIAELDTLNE DSYKDSTLIM QLLRDNLTLW TSDTQGD**ADE AQEGGD**N**
