# Supplementary material for: Effects of Flupyradifurone and Two Reference Insecticides Commonly Used in Toxicological Studies on the Larval Proteome of the Honey bee Apis mellifera
Source: Insects. 2023 Jan 12;14(1):77. doi: 10.3390/insects14010077 (PMC9862931; doi:10.3390/insects14010077)
Supplement: Supplementary file 1 [file insects-14-00077-s001.zip › S4-Supplementary data.xlsx]

## Sheet: Table S2
		Treatment dimethoate						Treatment fenoxycarb						Treatment flupyradifurone
		Spot volume						Spot volume						Spot volume
		Replicate 1	Replicate 2	Replicate 3	Replicate 4	Fold change of Mean spot volume dimethoate / Mean spot volume Control	t-Test of mean spot volume dimethoate / mean spot volume Control	Replicate 1	Replicate 2	Replicate 3	Replicate 4	Fold change of Mean spot volume fenoxycarb / Mean spot volume Control	t-Test of mean spot volume fenoxycarb / mean spot volume Control	Replicate 1	Replicate 2	Replicate 3	Replicate 4	Fold change of Mean spot volume flupyradifurone / Mean spot volume Control	t-Test of mean spot volume flupyradifurone / mean spot volume Control
	Glutathione S-transferase S1-like	86.7975	70.4484	89.1625	87.2066	-1.5735	0.0005	140.561	98.1812	93.3116	104.891	-1.02301	0.86	88.4894	142.537	47.9232	115.761	1.17358	0.37
	3-Ketoacyl-CoA thiolase	55.2653	66.3285	71.5166	70.7213	-1.68355	0.02	40.8667	125.024	109.796	57.642	-1.42305	0.2	8.38408	22.1592	15.7807	24.2471	-15.9617	0.009
	Major royal jelly protein 2	41.7495	125.57	89.7052	63.1716	-2.10635	0.02	27.2443	41.8649	27.8113	48.7844	-4.10688	0.0002	8.18408	5.99918	7.59071	4.15512	-30.9859	0.0007
	14-3-3 Protein zeta	93.8407	59.4546	63.7431	59.5332	-1.17485	0.35	72.0485	150.592	48.2883	105.758	-1.21481	0.44	93.0827	100.923	94.9179	78.6153	-1.60249	0.01
	Retinal dehydrogenase 1	30.1413	51.8701	54.9071	31.7317	-1.59983	0.02	129.812	95.2321	72.5066	158.535	1.16083	0.43	115.301	107.545	137.294	125.909	1.7826	0.0002

## Sheet: Spot quantities DEGs
		Spot volume Treatment				Spot volume Control
Treatment	Spot	Replicate 1	Replicate 2	Replicate 3	Replicate 4	Replicate 1	Replicate 2	Replicate 3	Replicate 4	Mean spot volume Treatment	Mean spot volume Control	Fold change of Mean spot volume Treatment / Mean spot volume Control	t-Test of mean spot volume Treatment / mean spot volume Control
Dimethoate	ID7804	290.225	165.939	210.537	117.104	86.1482	76.9817	76.4524	61.5428	195.951	75.2813	2.60292	0.0449598
Dimethoate	ID7811	437.528	302.203	283.079	181.735	23.3356	133.102	131.705	118.732	301.136	101.719	2.96048	0.0235985
Dimethoate	ID7813	222.683	249.694	171.241	237.4	41.6973	87.0922	102.397	116.027	220.255	86.8034	2.5374	0.0013412
Dimethoate	ID7815	238.284	297.648	127.902	195.809	44.1257	154.584	80.4477	111.74	214.911	97.7244	2.19915	0.0392313
Dimethoate	ID7816	204.261	186.481	207.735	189.861	77.2739	73.5177	104.914	146.955	197.084	100.665	1.95782	0.00766767
Dimethoate	ID7830	172.038	99.4742	150.973	93.7335	45.0519	72.6707	57.4852	66.8783	129.055	60.5215	2.13238	0.0324693
Dimethoate	ID7838	197.493	110.42	190.479	233.825	112.501	87.6977	108.101	86.3233	183.054	98.6556	1.85549	0.0434423
Dimethoate	ID7840	136.484	156.325	128.512	206.31	53.1961	59.7753	99.8777	111.55	156.908	81.0999	1.93475	0.0164087
Dimethoate	ID7842	97.8226	117.267	108.053	89.5939	45.7874	74.3828	55.0788	84.1059	103.184	64.8387	1.5914	0.013864
Dimethoate	ID7843	174.602	127.437	106.362	115.076	63.6372	75.411	73.5545	95.4859	130.869	77.0221	1.69911	0.0303259
Dimethoate	ID7844	138.126	129.108	209.365	150.63	63.0198	120.254	74.1604	129.072	156.807	96.6265	1.62282	0.0492442
Dimethoate	ID7845	106.009	131.766	213.116	231.859	65.0495	70.5862	61.9134	73.6624	170.688	67.8029	2.51741	0.0431246
Dimethoate	ID7851	102.915	149.822	118.928	106.022	72.3587	49.6574	60.9469	35.8863	119.421	54.7123	2.18271	0.00353199
Dimethoate	ID7863	88.4177	87.375	118.762	137.405	47.5833	87.549	82.0014	53.9476	107.99	67.7704	1.59347	0.0449382
Dimethoate	ID7876	105.924	99.5754	165.878	146.745	90.8076	92.7324	50.2439	68.2028	129.53	75.4967	1.71571	0.0350686
Dimethoate	ID7880	45.6782	59.1617	78.4446	83.4813	92.393	88.0562	99.9114	110.986	66.6915	97.8366	-1.467	0.0288731
Dimethoate	Retinal dehydrogenase	30.1413	51.8701	54.9071	31.7317	71.4139	61.6863	67.469	69.2429	42.1626	67.453	-1.59983	0.02
Dimethoate	ID7894	564.703	219.827	220.906	615.618	46.0514	41.0124	93.3967	51.4157	405.263	57.969	6.99103	0.0469987
Dimethoate	ID7895	56.0915	28.2865	21.2658	27.7829	54.776	64.1558	90.24	74.9285	33.3567	71.0251	-2.12926	0.0133383
Dimethoate	ID7899	55.4827	39.0096	20.3311	20.6124	100.634	131.551	52.7779	84.1458	33.859	92.2771	-2.72534	0.0291176
Dimethoate	ID7901	157.027	175.503	143.015	268.707	64.9879	68.6831	77.6391	131.082	186.063	85.598	2.17369	0.0292909
Dimethoate	ID7907	143.496	89.7356	114.304	98.759	17.8668	78.4138	74.0291	53.7788	111.574	56.0221	1.9916	0.022912
Dimethoate	ID7909	777.755	532.6	155.15	515.16	30.2412	3.1794	2.10476	26.662	495.166	15.5469	31.8499	0.0330864
Dimethoate	ID7914	394.422	319.197	342.04	251.159	41.2296	11.3713	34.5223	36.1061	326.704	30.8073	10.6048	0.00153728
Dimethoate	ID7919	117.641	120.127	139.72	122.439	84.3982	93.8562	94.7422	73.4035	124.982	86.6	1.44321	0.00161435
Dimethoate	ID7927	113.099	159.107	179.298	110.887	50.4495	49.3104	63.3269	69.0263	140.598	58.0283	2.42292	0.0132549
Dimethoate	ID7930	404.161	465.869	479.778	392.191	91.7628	82.9699	111.279	89.8145	435.5	93.9565	4.63512	0.000282375
Dimethoate	ID7934	144.547	102.327	99.1088	90.4066	53.9926	57.096	89.1511	36.777	109.097	59.2542	1.84117	0.0225001
Dimethoate	ID7940	203.483	150.757	104.22	218.98	70.151	61.8731	104.301	67.9849	169.36	76.0776	2.22615	0.0310792
Dimethoate	ID7944	123.72	87.2404	146.255	112.131	74.6876	64.907	65.8131	42.4747	117.336	61.9706	1.89342	0.0124005
Dimethoate	ID7945	230.717	198.505	223.618	203.068	109.565	68.5684	96.7359	169.883	213.977	111.188	1.92446	0.0120765
Dimethoate	ID7946	152.723	100.337	118.01	104.925	69.2377	64.2242	51.7887	63.9136	118.999	62.291	1.91037	0.0132693
Dimethoate	ID7948	156.22	134.03	198.069	173.881	109.751	111.387	92.1118	120.425	165.55	108.419	1.52695	0.0172909
Dimethoate	ID7949	92.7979	87.6315	97.5631	107.505	62.0854	75.3811	40.1722	57.8075	96.3745	58.8616	-1.63731	0.00722174
Dimethoate	ID7951	154.065	158.991	161.27	101.35	46.6744	99.9522	73.7196	104.774	143.919	81.2801	1.77066	0.018706
Dimethoate	ID7963	54.8203	71.1003	73.1099	72.485	133.659	104.131	90.1805	89.7787	67.8789	104.437	-1.53858	0.0303069
Dimethoate	ID7966	49.9593	105.525	71.694	122.203	106.178	170.681	150.676	160.46	87.3452	146.999	-1.68296	0.0335374
Dimethoate	ID7975	38.1341	56.4353	32.7864	47.5812	172.516	131.799	129.202	134.187	43.7342	141.926	-3.24519	0.000629153
Dimethoate	ID7979	54.429	68.2548	74.0318	84.2395	123.218	113.697	164.853	130.228	70.2388	132.999	-1.89353	0.00519679
Dimethoate	ID7981	10.7804	31.4352	34.9087	40.1585	108.837	75.2015	62.1725	91.3661	29.3207	84.3944	-2.87832	0.00559361
Dimethoate	3-Ketoacyl-CoA thiolase	55.2653	66.3285	71.5166	70.7213	110.991	141.787	104.657	86.7383	65.9579	111.043	-1.68355	0.0239113
Dimethoate	ID7996	78.6597	74.0592	42.4555	52.3989	111.712	88.6426	113.811	83.578	61.8933	99.436	-1.60657	0.0182223
Dimethoate	ID7999	78.6597	74.0592	42.4555	52.3989	111.712	88.6426	113.811	97.5183	61.8933	102.921	-1.66288	0.010021
Dimethoate	ID8010	219.404	195.32	296.523	149.075	111.27	94.2674	103.459	121.808	215.081	107.701	1.99702	0.0375329
Dimethoate	ID8023	106.128	128.977	156.91	138.435	116.033	81.4387	103.72	58.1478	132.612	89.8349	1.47618	0.0429457
Dimethoate	ID8038	124.855	113.966	118.88	128.718	173.846	257.188	209.545	195.626	121.605	209.051	-1.71911	0.0141523
Dimethoate	ID8066	32.8	32.0321	31.492	36.4055	5.70474	3.6971	12.5448	5.93295	33.1824	6.96991	4.76081	0.000100932
Dimethoate	Major royal jelly protein 2	41.7495	125.57	89.7052	63.1716	169.551	170.724	168.947	165.224	80.0491	168.612	-2.10635	0.0160215
Dimethoate	ID8096	60.5062	57.9888	61.4369	89.1416	19.6496	43.3659	13.2612	26.3424	67.2684	25.6548	2.62206	0.00553709
Dimethoate	ID8097	52.2523	49.4852	35.0342	31.2796	3.6971	2.54485	6.37257	5.6223	42.0128	4.55921	9.21493	0.00477618
Dimethoate	ID8100	84.4141	64.9865	55.3958	81.7607	17.4025	33.6223	32.8	32.0321	71.6393	28.9642	2.47337	0.00356371
Dimethoate	ID8116	89.3902	102.09	83.6144	75.7138	226.825	188.456	302.746	144.911	87.702	215.734	2.45986	0.029716
Dimethoate	ID8119	76.5067	101.335	96.5809	90.6528	76.2386	46.8621	65.4755	68.1924	91.269	64.1921	1.42181	0.0170263
Dimethoate	ID8122	43.5999	41.0645	44.9284	57.8466	144.542	106.994	108.726	149.456	46.8598	127.429	-2.71937	0.0034946
Dimethoate	ID8125	43.9461	57.242	28.6403	51.1059	35.1892	25.3956	25.1205	16.067	45.2336	25.4431	1.77783	0.0414927
Dimethoate	ID8126	32.4854	47.1795	41.7985	31.5483	172.905	102.565	92.529	119.925	38.2529	121.981	-3.1888	0.0162218
Dimethoate	ID8128	116.717	32.3198	106.768	117.127	2.01489	32.8877	17.1494	19.303	93.2329	17.8387	5.22643	0.0293845
Dimethoate	ID8131	19.3577	47.9766	45.3352	24.8525	95.5372	90.0951	91.725	64.9163	34.3805	85.5684	-2.48886	0.00221263
Dimethoate	ID8148	67.6322	41.292	44.2476	30.2495	128.256	145.847	117.48	142.659	45.8553	133.56	-2.91265	0.000164654
Dimethoate	ID8154	74.5216	59.2652	50.5108	47.3719	85.6305	105.946	99.0446	89.4592	57.9174	95.0201	-1.64062	0.00341411
Dimethoate	ID8155	57.6639	32.282	41.3184	37.7768	101.638	127.401	167.663	119.218	42.2603	128.98	-3.05204	0.00481906
Dimethoate	ID8157	76.9011	71.2709	70.3881	43.5003	137.225	116.983	105.981	123.944	65.5151	121.033	-1.84741	0.00148114
Dimethoate	ID8171	43.7847	65.2265	30.5728	53.7603	37.8821	7.2373	8.19247	9.9412	48.3361	15.8133	3.05668	0.0205908
Dimethoate	ID8175	55.9516	63.2147	58.8709	87.8127	152.922	123.681	136.89	127.937	66.4625	135.358	-2.0366	0.000422978
Dimethoate	Glutathione s-transferase S1-like	86.7975	70.4484	89.1625	87.2066	140.873	125.588	123.213	135.268	83.4037	131.236	-1.5735	0.0005
Dimethoate	ID8196	31.0385	36.3167	26.826	21.6223	240.162	103.879	206.288	105.78	28.9509	164.027	-5.66571	0.0299141
Dimethoate	ID8198	72.7798	56.5014	65.3509	98.0522	97.3765	109.898	110.058	112.381	73.1711	107.428	0.681116	0.0246356
Dimethoate	ID8204	101.995	117.454	133.389	104.912	33.0441	45.0119	99.5013	67.0873	114.437	61.1611	1.87108	0.0269036
Dimethoate	ID8214	54.6121	51.8109	43.8228	32.286	146.849	80.1307	81.3625	133.111	45.6329	110.363	-2.4185	0.028804
Dimethoate	ID8216	105.891	88.7691	64.0945	111.188	18.1593	17.8218	39.8665	41.391	92.4856	29.3096	3.15547	0.003877
Dimethoate	ID8229	71.9663	78.2823	85.6469	91.6942	6.37257	9.52983	5.6223	8.19247	81.8974	7.42929	11.0236	0.000275056
Fenoxycarb	Major royal jelly protein 2	27.2443	41.8649	27.8113	48.7844	122.964	162.621	174.117	138.691	36.4262	149.598	-4.10688	0.0002
Fenoxycarb	ID8126	28.9687	29.4638	36.5926	31.6102	117.299	123.147	51.1177	99.9091	31.6588	97.8683	-3.09134	0.0263702
Fenoxycarb	ID8109	23.0678	53.0979	23.8426	35.8011	66.7191	84.9236	101.365	98.5296	33.9524	87.8844	-2.58846	0.00231939
Fenoxycarb	ID8122	29.4687	60.3992	41.3409	34.9656	118.762	103.539	82.9545	69.1043	41.5436	93.5902	-2.25282	0.00998885
Fenoxycarb	ID8105	43.1374	85.1818	25.5354	40.1099	170.294	109.293	192.637	128.869	48.4911	150.273	-3.09898	0.00599175
Fenoxycarb	ID8053	34.7533	45.702	49.647	19.3531	95.58	43.101	72.5452	71.2144	37.3638	70.6101	-1.8898	0.0466685
Fenoxycarb	ID8131	17.8386	24.9338	21.7809	21.6381	118.108	60.2663	66.1311	64.2262	21.5478	77.1828	-3.58193	0.0261764
Fenoxycarb	ID8000	26.8517	30.179	51.97	55.9069	149.493	278.053	148.254	109.578	41.2269	171.345	-4.15614	0.0357039
Fenoxycarb	ID7998	11.1171	45.2848	33.004	26.6749	51.2039	69.3875	40.8775	81.2058	29.0202	60.6687	-2.09057	0.0350451
Fenoxycarb	ID8102	189.878	177.621	131.727	120.051	63.7541	105.99	64.7951	92.1358	154.819	81.6686	1.8957	0.014777
Fenoxycarb	ID7979	110.437	115.884	125.476	86.5513	62.5703	89.5766	60.8919	75.625	109.587	72.166	1.51855	0.0135
Fenoxycarb	ID8129	118.342	65.1799	128.861	118.528	72.3912	57.1823	74.2378	46.3902	107.728	62.5504	1.72225	0.0435847
Fenoxycarb	ID7950	47.0192	96.2473	89.423	60.1858	97.0867	149.919	155.648	102.806	73.2188	126.365	-1.72585	0.0355624
Fenoxycarb	ID8130	31.361	33.1391	48.389	47.4507	104.909	90.3332	51.0179	82.8399	40.085	82.2749	-2.05251	0.0269513
Fenoxycarb	ID7846	232.796	160.013	231.472	195.826	139.087	103.092	63.2406	119.242	205.027	106.165	1.9312	0.00582879
Fenoxycarb	ID7947	63.774	20.0992	40.4361	51.3099	179.481	136.283	152.527	197.961	43.9048	166.563	-3.79373	0.000568541
Fenoxycarb	ID8146	189.829	185.358	179.127	196.833	86.4342	146.559	117.891	91.7839	187.787	110.667	1.69686	0.00871209
Fenoxycarb	ID8093	34.1258	60.8793	95.5027	23.328	117.102	209.732	159.873	183.618	53.4589	167.581	-3.13476	0.00455121
Fenoxycarb	ID8145	58.3062	61.2883	67.1477	66.5578	45.1149	22.8604	13.5876	18.5126	63.325	25.0189	2.53109	0.00860197
Flupyradifurone	ID1602	15.3275	64.1421	20.6025	40.3535	284.594	313.806	235.384	347.475	35.1064	295.315	-8.41199	0.000426839
Flupyradifurone	ID1892	18.5724	19.1181	18.0823	16.3395	206.259	84.6466	262.874	139.434	18.0281	173.303	-9.61297	0.0280598
Flupyradifurone	ID1887	63.1984	65.2449	56.8936	57.3475	111.495	102.23	157.1	132.769	60.6711	125.899	-2.0751	0.0115403
Flupyradifurone	ID1886	6.88465	52.5009	5.72591	5.48298	203.853	157.284	118.969	304.089	17.6486	196.049	-11.1085	0.0169683
Flupyradifurone	ID1875	4.15307	39.3358	1.84659	10.2119	166.83	151.929	146.889	294.898	13.8868	190.136	-13.6918	0.012666
Flupyradifurone	ID1860	69.5118	58.7158	62.3691	69.8521	114.795	94.4873	100.986	126.621	65.1122	109.222	-1.67745	0.00510147
Flupyradifurone	ID1850	58.2314	49.6857	65.7594	57.1522	103.396	66.5024	121.583	114.17	57.7072	101.413	-1.75737	0.033104
Flupyradifurone	ID1846	7.1398	42.6313	5.02964	12.1299	317.503	115.962	210.449	219.374	16.7326	215.822	-12.8983	0.0147158
Flupyradifurone	ID1844	9.43156	41.1359	37.5709	9.8739	254.156	207.517	149.31	269.522	24.5031	220.127	-8.98363	0.003381
Flupyradifurone	ID1842	100.839	74.8183	81.3705	70.0354	112.306	114.459	156.626	132.198	81.7659	128.897	-1.57642	0.0113406
Flupyradifurone	ID1841	11.0368	14.8767	15.5758	17.7385	108.504	66.175	106.423	169.338	14.807	112.61	-7.60521	0.0190875
Flupyradifurone	ID1835	17.5109	32.0061	16.8316	17.8318	121.286	95.3832	205.351	110.075	21.0451	133.024	-6.32089	0.0188344
Flupyradifurone	ID1834	11.0861	86.3554	24.0114	9.42487	418.995	176.779	362.166	129.342	32.7194	271.82	-8.30761	0.0381765
Flupyradifurone	ID1832	37.5408	104.539	37.186	33.696	162.239	162.086	272.503	97.3355	53.2404	173.541	-3.25957	0.0370076
Flupyradifurone	ID1823	54.3888	58.5726	50.0498	46.7027	120.678	105.306	160.545	154.235	52.4285	135.191	-2.57858	0.007044
Flupyradifurone	ID1820	138.117	106.977	97.6193	91.2508	43.9604	59.9881	55.5332	53.226	108.491	53.1769	2.04019	0.0092566
Flupyradifurone	ID1818	15.1155	19.1561	13.2832	11.8577	156.755	109.196	143.75	59.5023	14.8531	117.301	-7.89739	0.0177574
Flupyradifurone	ID1814	74.4228	79.7391	86.678	62.0748	112.805	98.9832	151.713	119.934	75.7287	120.859	-1.59595	0.0194103
Flupyradifurone	ID1799	183.609	170.377	204.41	146.216	107.969	103.581	85.1301	64.4433	176.153	90.2809	1.95116	0.00178841
Flupyradifurone	ID1794	71.2377	74.8528	102.414	70.674	139.948	172.618	162.71	221.658	79.7946	174.234	-2.18353	0.00682709
Flupyradifurone	ID1784	53.6355	60.8457	43.2173	37.0968	146.406	100.604	136.162	182.344	48.6988	141.379	-2.90313	0.0084193
Flupyradifurone	ID1777	15.8074	68.2609	23.4256	14.9703	648.068	296.004	531.929	225.96	30.6161	425.49	-13.8976	0.0271064
Flupyradifurone	ID1769	8.21505	33.1631	16.163	9.54027	187.006	155.656	261.594	162.465	16.7704	191.68	-11.4297	0.00417164
Flupyradifurone	ID1765	44.7106	84.9772	53.8086	45.2192	135.373	123.833	136.45	128.942	57.1789	131.149	-2.29367	0.0026908
Flupyradifurone	ID1763	1.86814	17.3577	4.65505	4.14342	133.784	216.997	221.493	194.351	7.00607	191.656	-27.3558	0.00227855
Flupyradifurone	ID1762	19.8669	44.156	11.4909	6.1291	109.404	97.0785	119.42	180.309	20.4107	126.553	-6.20031	0.0056351
Flupyradifurone	ID1761	59.7939	81.5285	63.8453	62.9852	103.213	95.7618	113.059	108.144	67.0382	105.044	-1.56693	0.00108263
Flupyradifurone	Major royal jelly protein 2	8.18408	5.99918	7.59071	4.15512	222.135	158.31	206.751	216.239	6.48227	200.859	-30.9859	0.0007
Flupyradifurone	ID1757	62.0591	57.7821	48.1129	45.7067	101.184	92.6727	170.726	121.814	53.4152	121.599	-2.27649	0.0269633
Flupyradifurone	ID1754	60.8705	79.3117	66.5929	58.8713	174.19	159.178	250.055	173.856	66.4116	189.319	-2.8507	0.00764323
Flupyradifurone	ID1747	11.848	59.0481	11.7554	10.1484	472.869	209.637	549.034	348.038	23.2	394.895	-17.0213	0.0141541
Flupyradifurone	ID1740	17.4962	85.1566	17.8993	16.8722	423.675	328.903	531.209	148.618	34.3561	358.101	-10.4232	0.0255999
Flupyradifurone	ID1738	0.031163	81.3533	10.468	1.49843	138.155	66.1769	127.478	186.327	23.3377	129.534	-5.55042	0.0161787
Flupyradifurone	ID1733	21.1431	38.0255	17.9485	28.3165	559.115	392.073	728.315	245.492	26.3584	481.249	-18.2579	0.0221921
Flupyradifurone	ID1722	8.11061	46.4559	8.12419	5.66447	173.021	144.029	226.578	431.484	17.0888	243.778	-14.2654	0.0380388
Flupyradifurone	ID1720	24.2437	75.2494	24.0452	8.71854	138.47	103.25	165.997	172.665	33.0642	145.095	-4.38829	0.0020147
Flupyradifurone	ID1714	19.8221	47.4903	16.5191	14.2065	225.68	297.486	267.244	119.141	24.5095	227.388	-9.27753	0.0120413
Flupyradifurone	ID1712	7.73855	45.1415	8.47964	6.96523	225.303	118.842	93.411	163.656	17.0812	150.303	-8.79931	0.0147281
Flupyradifurone	ID1710	5.95624	33.9639	5.20851	2.18865	248.301	282.047	391.564	101.794	11.8293	255.926	-21.6349	0.0255678
Flupyradifurone	ID1709	69.7345	81.5332	82.7804	77.5176	164.44	151.917	219.424	107.077	77.8914	160.715	-2.06331	0.0360986
Flupyradifurone	ID1697	59.7179	82.3643	72.6178	52.2523	150.532	122.753	127.097	183.195	66.7381	145.894	-2.18607	0.00544692
Flupyradifurone	ID1693	49.5077	77.6376	54.6428	50.1534	98.1964	107.655	92.3056	113.592	57.9854	102.937	-1.77522	0.0020916
Flupyradifurone	ID1687	92.8214	100.094	98.8277	57.88	155.518	97.5913	144.524	163.115	87.4059	140.187	-1.60386	0.0291123
Flupyradifurone	ID1686	23.6857	29.9241	18.1412	9.66248	423.629	190.939	376.468	423.473	20.3534	353.627	-17.3744	0.00894836
Flupyradifurone	ID1681	104.123	83.4794	67.0041	48.7052	157.916	102.744	194.374	124.927	75.8278	144.99	-1.9121	0.0318698
Flupyradifurone	ID1678	15.5234	91.3232	9.12596	20.1169	222.811	196.161	127.783	263.269	34.0224	202.506	-5.95214	0.00387513
Flupyradifurone	ID1674	82.5767	74.8059	69.7121	23.0374	104.158	109.855	154.235	149.95	62.533	129.55	-2.0717	0.0117565
Flupyradifurone	ID1671	87.2711	99.4542	81.4248	68.2202	149.585	137.113	184.866	178.859	84.0926	162.606	-1.93365	0.00228379
Flupyradifurone	ID1665	87.5374	90.9166	90.7175	68.4709	128.05	121.706	157.978	158.932	84.4106	141.667	-1.6783	0.0044908
Flupyradifurone	ID1662	119.679	71.2128	88.7383	78.6482	143.394	118.673	173.306	157.428	89.5696	148.201	-1.65459	0.00992489
Flupyradifurone	ID1659	106.08	121.762	99.5778	84.8343	155.457	151.449	238.884	194.802	103.064	185.148	-1.79645	0.0213011
Flupyradifurone	ID1658	127.072	109.314	101.333	116.93	168.583	137.632	199.586	212.935	113.662	179.684	-1.58086	0.0240443
Flupyradifurone	ID1650	57.3844	85.3177	56.2404	57.4527	160.887	149.059	243.701	126.358	64.0988	170.001	-2.65218	0.0216097
Flupyradifurone	ID1648	43.1262	82.9779	33.2833	35.2954	215.037	165.705	280.063	317.18	48.6707	244.496	-5.02347	0.00666879
Flupyradifurone	ID1647	70.8579	79.4602	60.1981	66.7237	135.576	116.038	186.948	160.708	69.31	149.817	-2.16156	0.0108451
Flupyradifurone	ID1640	83.8053	136.403	71.5113	75.2438	194.717	138.52	175.325	175.541	91.7409	171.026	-1.86422	0.00688504
Flupyradifurone	ID1634	73.2611	96.0704	61.8483	64.605	123.803	114.176	139.901	155.508	73.9462	133.347	-1.8033	0.00271567
Flupyradifurone	ID1627	79.6818	98.6607	77.5467	89.9821	157.277	120.95	159.021	152.896	86.4678	147.536	-1.70625	0.00240414
Flupyradifurone	ID1623	4.78972	25.3997	17.8443	3.20054	650.952	336.291	640.665	513.473	12.8085	535.345	-41.7959	0.00553965
Flupyradifurone	ID1618	110.396	144.4	105.944	205.398	0.127691	30.7173	111.401	87.0586	141.535	57.3262	2.46894	0.0498413
Flupyradifurone	ID1617	5.22889	10.4296	2.5334	12.8056	304.044	207.407	441.964	414.983	7.74935	342.1	-44.1456	0.00837467
Flupyradifurone	14-3-3 protein zeta	93.0827	100.923	94.9179	78.6153	120.847	140.175	179.474	148.483	91.8848	147.245	-1.60249	0.0142513
Flupyradifurone	ID1612	48.2478	49.0218	38.1289	44.8932	160.41	139.866	166.166	131.843	45.0729	149.571	-3.31843	0.000499003
Flupyradifurone	ID1610	38.4993	53.014	44.896	54.0847	204.736	249.385	216.15	135.508	47.6235	201.445	-4.22994	0.00686451
Flupyradifurone	ID1606	27.4184	30.1121	25.3977	24.2848	227.283	175.361	230.177	227.843	26.8033	215.166	-8.02761	0.000698904
Flupyradifurone	ID1601	65.6704	84.3146	67.8822	80.0617	238.138	176.388	198.356	278.879	74.4823	222.94	-2.9932	0.0059707
Flupyradifurone	ID1600	65.8353	84.3793	158.429	119.431	189.062	139.401	244.93	163.995	107.018	184.347	-1.72257	0.0445416
Flupyradifurone	ID1598	71.8934	68.9705	62.7026	62.8372	123.745	99.5316	141.458	126.323	66.6009	122.764	-1.84328	0.00553365
Flupyradifurone	ID1597	46.5413	84.7545	54.721	49.9	263.38	196.456	269.357	323.238	58.9792	263.108	-4.46103	0.00241571
Flupyradifurone	ID1596	32.0691	42.9152	45.2009	33.7737	334.556	284.966	327.485	345.846	38.4897	323.213	-8.39739	0.000114175
Flupyradifurone	ID1593	55.8682	73.5286	48.9721	42.1792	130.635	117.108	187.482	125.661	55.137	140.221	-2.54314	0.0078773
Flupyradifurone	ID1592	117.012	166.081	109.732	93.1355	187.659	205.397	263.917	169.29	121.49	206.566	-1.70027	0.0181352
Flupyradifurone	ID1590	67.0348	93.7687	61.1408	55.0045	158.705	161.582	237.842	145.975	69.2372	176.026	-2.54237	0.00921729
Flupyradifurone	ID1589	29.6584	25.4491	28.0949	28.6643	228.35	213.854	255.337	222.648	27.9666	230.047	-8.22577	0.000168484
Flupyradifurone	ID1585	11.569	73.3817	13.6707	6.91634	613.274	271.099	441.146	477.115	26.3844	450.658	-17.0805	0.00747915
Flupyradifurone	ID1584	9.35831	50.6559	10.8724	5.64633	277.578	210.655	263.443	317.198	19.1332	267.219	-13.9662	0.000358651
Flupyradifurone	ID1577	79.8182	91.2112	57.2074	53.6868	206.237	207.214	280.429	119.375	70.4809	203.314	-2.88466	0.0233753
Flupyradifurone	ID1576	53.5524	96.8785	56.7801	52.849	147.131	153.195	251.43	102.177	65.015	163.483	-2.51455	0.0458759
Flupyradifurone	ID1575	48.5312	67.212	43.7017	17.6932	261.813	254.367	382.504	98.1225	44.2845	249.201	-5.62728	0.0369785
Flupyradifurone	ID1569	43.058	47.6409	25.353	45.3041	238.801	209.298	310.992	108.512	40.339	216.901	-5.37695	0.0236242
Flupyradifurone	ID1567	40.3529	47.4799	26.4732	40.6621	122.351	102.949	256.02	149.106	38.742	157.607	-4.0681	0.0388301
Flupyradifurone	3-Ketoacyl-CoA thiolase	8.38408	22.1592	15.7807	24.2471	264.135	158.31	467.751	236.239	17.6428	281.609	-15.9617	0.009
Flupyradifurone	ID1563	8.12374	57.569	24.0241	29.1808	311.809	220.509	159.895	389.362	29.7244	270.394	-9.09669	0.0154685
Flupyradifurone	ID1556	28.0505	125.782	17.5863	25.125	285.693	279.362	89.9991	343.42	49.1359	249.619	-5.08017	0.0275078
Flupyradifurone	ID1554	14.2046	105.143	36.8775	33.0451	306.822	321.859	287.404	465.757	47.3175	345.46	-7.3009	0.00203742
Flupyradifurone	ID1551	0.0936621	86.9119	9.33943	53.4518	163.19	223.718	229.287	287.592	37.4492	225.947	-6.03342	0.00136255
Flupyradifurone	ID1547	93.1512	58.0787	74.4901	98.6516	117.345	164.424	123.965	96.5345	81.0929	125.567	-1.54844	0.0455481
Flupyradifurone	ID1533	155.743	146.408	129.35	137.277	82.6638	100.568	105.865	79.8716	142.195	92.242	1.54154	0.00121335
Flupyradifurone	ID1530	118.934	127.811	120.002	134.313	68.2421	79.0065	76.3409	101.504	125.265	81.2735	1.54128	0.00386821
Flupyradifurone	ID1529	134.018	107.505	121.644	126.004	74.8569	77.0906	103.87	65.0946	122.293	80.2281	1.52431	0.00757867
Flupyradifurone	ID1527	182.274	207.247	201.18	225.504	62.7038	87.9559	71.3452	126.063	204.051	87.017	2.34496	0.00083454
Flupyradifurone	ID1523	243.106	215.817	235.043	186.148	121.382	147.024	165.666	95.6933	220.028	132.441	1.66133	0.00484271
Flupyradifurone	ID1515	64.2737	50.876	62.7688	78.2796	250.809	291.957	325.365	81.5264	64.0495	237.414	-3.70673	0.0484803
Flupyradifurone	ID1506	53.009	104.023	53.2839	77.4485	262.122	199.64	181.791	109.248	71.9411	188.2	-2.61603	0.0274493
Flupyradifurone	ID1497	45.0913	82.0954	36.3049	31.7138	177.98	142.139	203.04	112.28	48.8013	158.86	-3.25523	0.00553394
Flupyradifurone	ID1493	98.9855	84.2966	82.5756	78.4846	194.352	181.575	228.046	132.89	86.0855	184.216	-2.13991	0.0132711
Flupyradifurone	ID1490	120.928	104.587	98.0501	89.9972	189.847	205.134	217.845	138.902	103.39	187.932	-1.81769	0.0112951
Flupyradifurone	ID1471	2.50366	139.124	5.29514	2.21978	346.774	176.772	379.923	96.6105	37.2857	250.02	-6.70552	0.0433517
Flupyradifurone	ID1464	38.9329	110.533	36.6704	36.7707	211.803	234.389	389.592	271.467	55.7267	276.813	-4.96733	0.00613881
Flupyradifurone	ID1460	20.1943	149.435	26.7432	11.165	322.29	329.586	572.101	308.898	51.8843	383.219	-7.38603	0.00717941
Flupyradifurone	ID1445	80.7493	90.4896	73.9629	76.0833	130.604	123.365	159.263	179.943	80.3213	148.294	-1.84626	0.0107878
Flupyradifurone	ID1436	132.131	106.534	114.939	107.912	63.7882	48.6042	53.6198	68.2715	115.379	58.5709	1.9699	0.000350875
Flupyradifurone	ID1430	145.817	143.96	141.447	116.806	41.8611	52.8587	57.6963	62.7393	137.007	53.7888	2.54714	0.000124055
Flupyradifurone	ID1429	66.0649	139.155	76.3753	64.9806	134.999	198.609	275.76	179.824	86.644	197.298	-2.27711	0.0237662
Flupyradifurone	Retinal dehydrogenase	115.301	107.545	137.294	125.909	66.3821	84.6466	59.5963	62.0384	121.512	68.1658	1.7826	0.0002
Flupyradifurone	ID1427	55.2094	89.8123	65.9548	63.0387	128.365	121.434	111.707	135.889	68.5038	124.349	-1.81521	0.0012996
Flupyradifurone	ID1422	66.3821	84.6466	59.5963	62.0384	158.301	107.545	137.294	180.909	68.1658	146.012	-2.14202	0.0107808
Flupyradifurone	ID1420	148.589	165.233	138.228	137.839	80.7827	77.3858	83.3693	108.146	147.472	87.4208	1.68692	0.000759658
Flupyradifurone	ID1412	302.009	184.02	305.97	294.938	46.3378	94.9786	95.9406	29.8652	271.734	66.7806	4.06906	0.00205029
Flupyradifurone	ID1410	258.73	138.241	224.992	262.143	20.0615	57.8161	66.2712	0.769862	221.026	36.2297	6.1007	0.00315771
Flupyradifurone	ID1401	100.21	85.606	104.12	101.385	61.3579	62.42	84.1031	48.6814	97.8302	64.1406	1.52525	0.0116049
Flupyradifurone	ID1397	100.354	86.4123	94.3537	99.3682	48.4499	55.8869	75.7377	39.8828	95.122	54.9894	1.72983	0.00832744
Flupyradifurone	ID1391	77.8216	63.7942	75.6978	88.1965	133.86	121.953	146.903	106.073	76.3775	127.197	-1.66537	0.00436583
Flupyradifurone	ID1387	67.3739	98.1926	51.3815	29.9289	338.57	246.979	385.247	261.986	61.7192	308.196	-4.99351	0.00204122
Flupyradifurone	ID1383	46.5877	93.7695	39.1192	66.3067	251.093	228.52	366.392	388.739	61.4458	308.686	-5.02371	0.00607206
Flupyradifurone	ID1374	27.3313	115.655	34.4025	49.5426	172.201	181.647	100.959	222.324	56.7327	169.283	-2.98386	0.0141331
Flupyradifurone	ID1361	68.8795	72.1279	64.3071	51.0781	173.67	119.908	158.331	88.1647	64.0981	135.018	-2.10643	0.0312991
Flupyradifurone	ID1359	57.5632	142.593	69.9835	87.6013	149.253	156.502	142.629	155.329	89.4353	150.928	-1.68757	0.0444793
Flupyradifurone	ID1344	154.532	136.929	129.335	144.918	62.4172	98.4219	126.69	66.662	141.429	88.5477	1.5972	0.0325243
Flupyradifurone	ID1317	279.489	95.3382	254.599	221.573	32.3142	93.03	139.501	35.017	212.75	74.9656	2.83796	0.0352964
Flupyradifurone	ID1292	244.76	88.2543	221.764	165.188	62.4951	42.7228	81.5381	46.7954	179.991	58.3878	3.08269	0.0358599
Flupyradifurone	ID1282	21.1708	139.659	8.87971	0.56135	179.552	196.313	72.9742	284.968	42.5677	183.452	-4.30964	0.0440901
Flupyradifurone	ID1281	37.9566	83.1451	28.2357	35.3267	192.013	171.846	90.5745	252.516	46.166	176.737	-3.8283	0.0234161
Flupyradifurone	ID1252	26.7267	47.0977	21.1503	5.17223	202.18	159.389	296.171	238.046	25.0367	223.947	-8.94473	0.00421964
Flupyradifurone	ID1158	13.8418	36.5571	9.40286	94.8768	277.763	304.865	399.711	196.054	38.6696	294.598	-7.61833	0.00437655
Flupyradifurone	ID1142	56.3146	96.6748	48.9558	103.353	154.461	183.24	111.874	199.266	76.3246	162.21	-2.12527	0.0128785
Flupyradifurone	ID1106	127.464	91.3159	106.962	165.047	45.6283	38.4196	60.9083	32.0371	122.697	44.2483	2.77293	0.0108227
Flupyradifurone	ID1091	258.606	92.7153	231.775	137.163	31.5691	38.9623	38.1768	38.6325	180.065	36.8352	4.88839	0.0349414
Flupyradifurone	ID1072	169.673	98.0579	139.214	178.576	28.6607	35.567	62.2274	15.3751	146.38	35.4576	4.12832	0.00382948
